# Supplementary material for: First evidence of European eels exiting the Mediterranean Sea during their spawning migration
Source: PubMed Central journal article supplement (PMC4764813; doi:10.1038/srep21817), 2016-02-24

**Supplementary information**

**First evidence of European eels exiting the Mediterranean Sea during their spawning migration**

Elsa Amilhat<sup>1,2\*</sup>, Kim Aarestrup<sup>3</sup>, Elisabeth Faliex<sup>1,2</sup>, Gaël Simon<sup>1,2</sup>, Håkan Westerberg<sup>4</sup>, and David Righton<sup>5</sup>

**Supplementary Figure S1:** Time-series (depth in m and temperature in °C) transmitted by tags deployed on European eels in the Mediterranean. Plots show depth data coloured by temperature. Grey points indicate depth measurements transmitted without a concurrent temperature record.

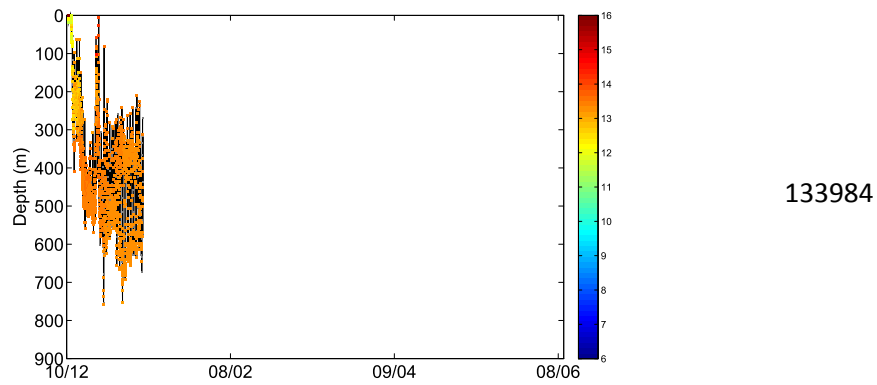

133984

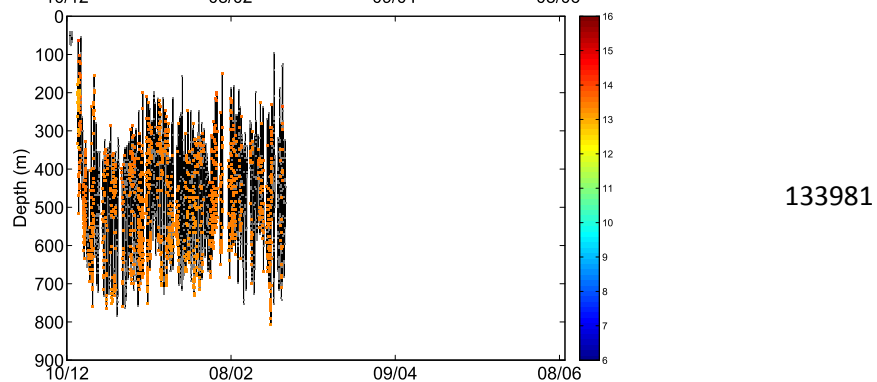

133981

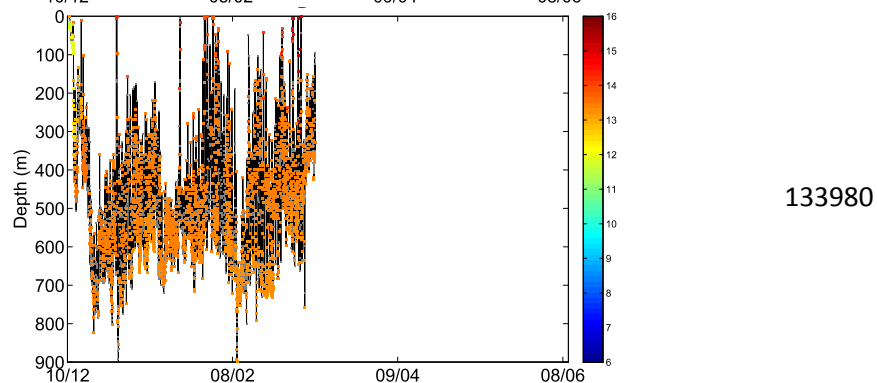

133980

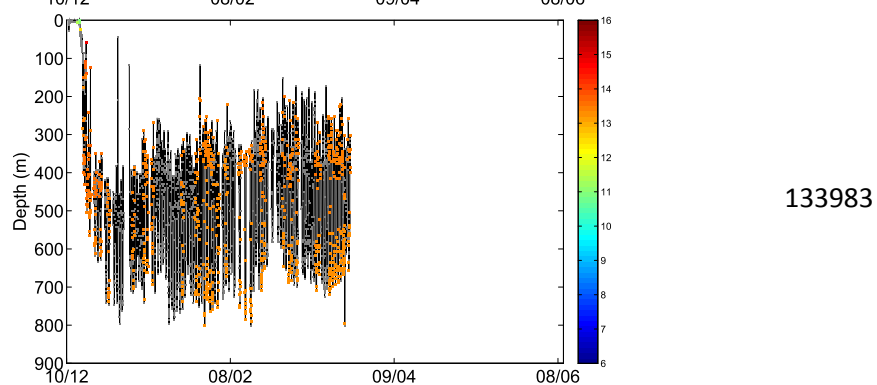

133983

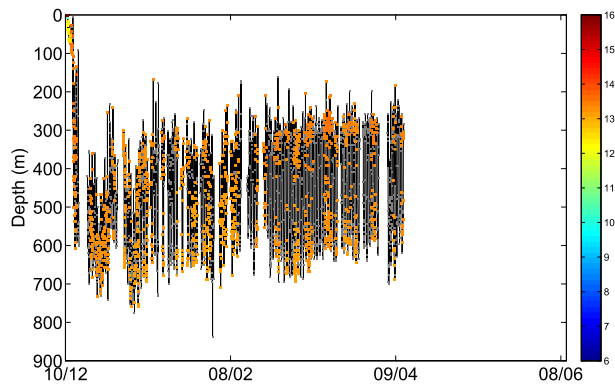

133982

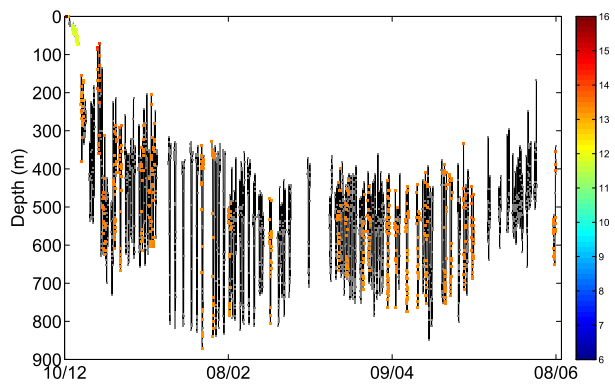

133985

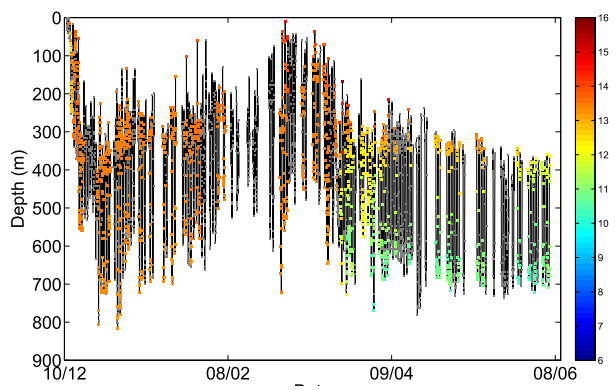

133979

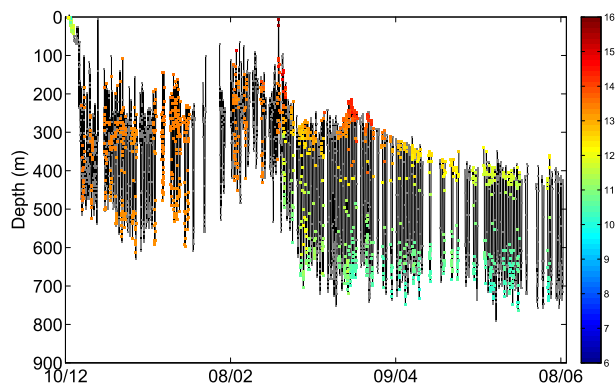

133986

**Supplementary Figure S2:** Plots of predation events. The grey rectangles indicate when the predation took place. The grey symbols correspond to depth values and the red to the temperatures.

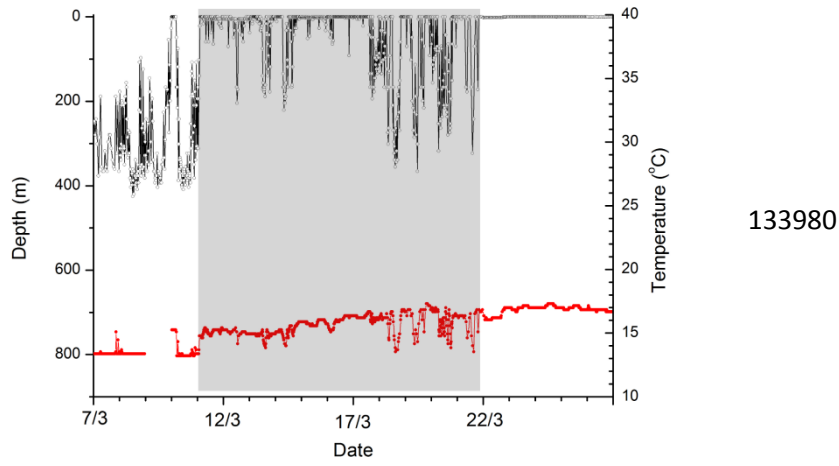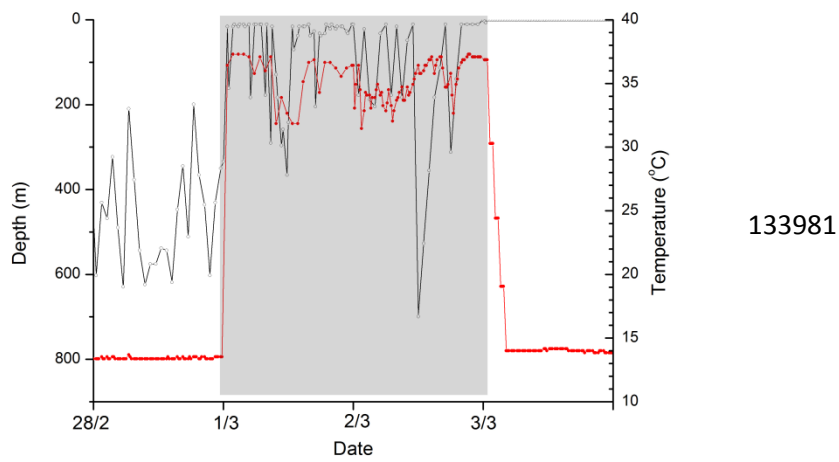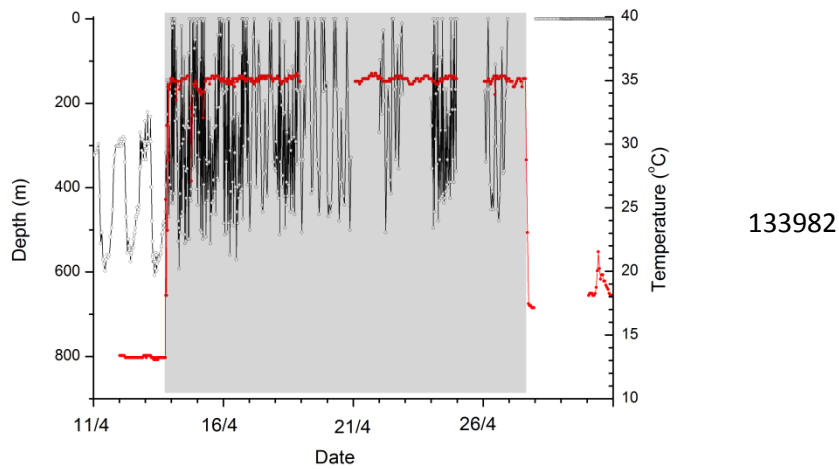

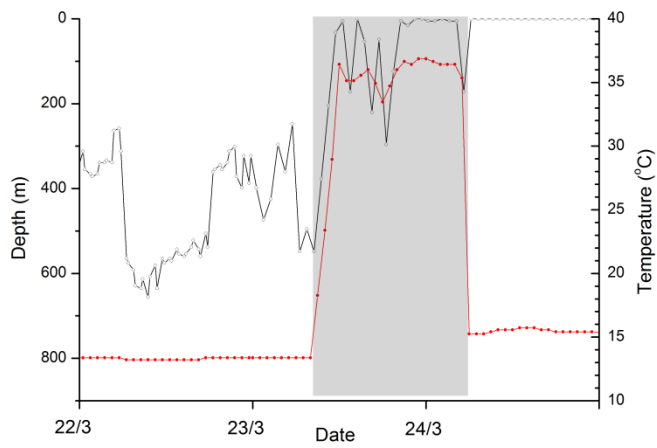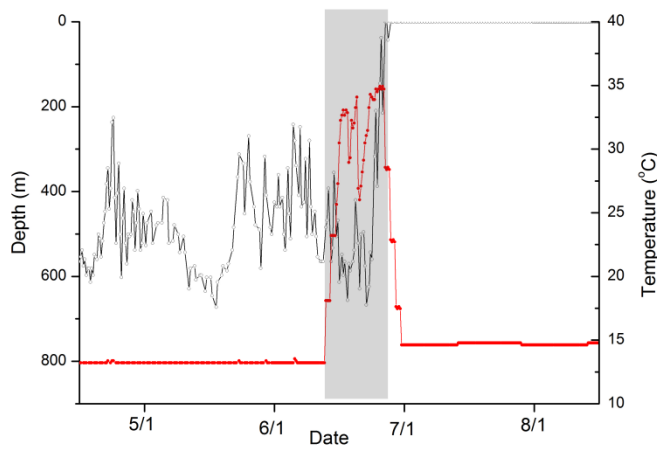

Supplement: srep21817-s1.pdf [file srep21817-s1.pdf]
